# Supplementary material
Source: PubMed Central journal article supplement (PMC5978299)
Supplement: EMBJ-37-e97138-s001.pdf [file EMBJ-37-e97138-s001.pdf]

# Appendix

## Appendix figures

**Appendix Figure S1.** Specific binding of IRF1 to the IRF1 binding site in the upstream MICA promoter

**Appendix Figure S2.** E4BP4 represses the upstream MICA promoter

## Appendix tables

**Appendix Table S1.** Summary of generation of isogenic BAC cell lines

**Appendix Table S2.** Primer sequences

**Appendix Table S3.** Details of plasmid construction

**Appendix Table S4.** Details of BAC construction

**Appendix Table S5.** Coordinates of promoter pairs

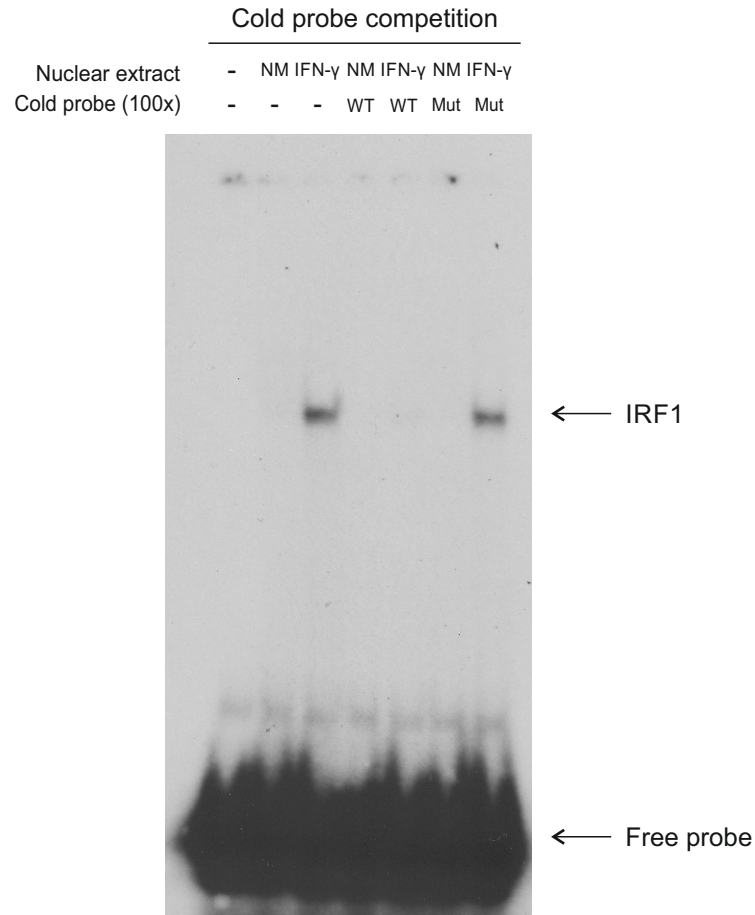

**Appendix Figure S1.** Specific binding of IRF1 to the IRF1 binding site in the upstream MICA promoter.

EMSA showing specific binding of IRF1 to the upstream promoter site. Nuclear extracts from untreated (NM) or interferon- $\gamma$  treated (IFN- $\gamma$ ) primary human arterial endothelial cells were pre-incubated with excess unlabeled probe containing the wild-type upstream promoter IRF1 site (WT) or the mutant site used in the reporter assay (Mut), before addition of the  $^{32}$ P-labeled probe containing the wild-type upstream promoter IRF1 site. The binding of IRF1 induced by interferon- $\gamma$  was competed off by the wild-type, but not the mutant cold probe. This demonstrates that specific binding of IRF1 to the upstream promoter site is induced by interferon- $\gamma$ .

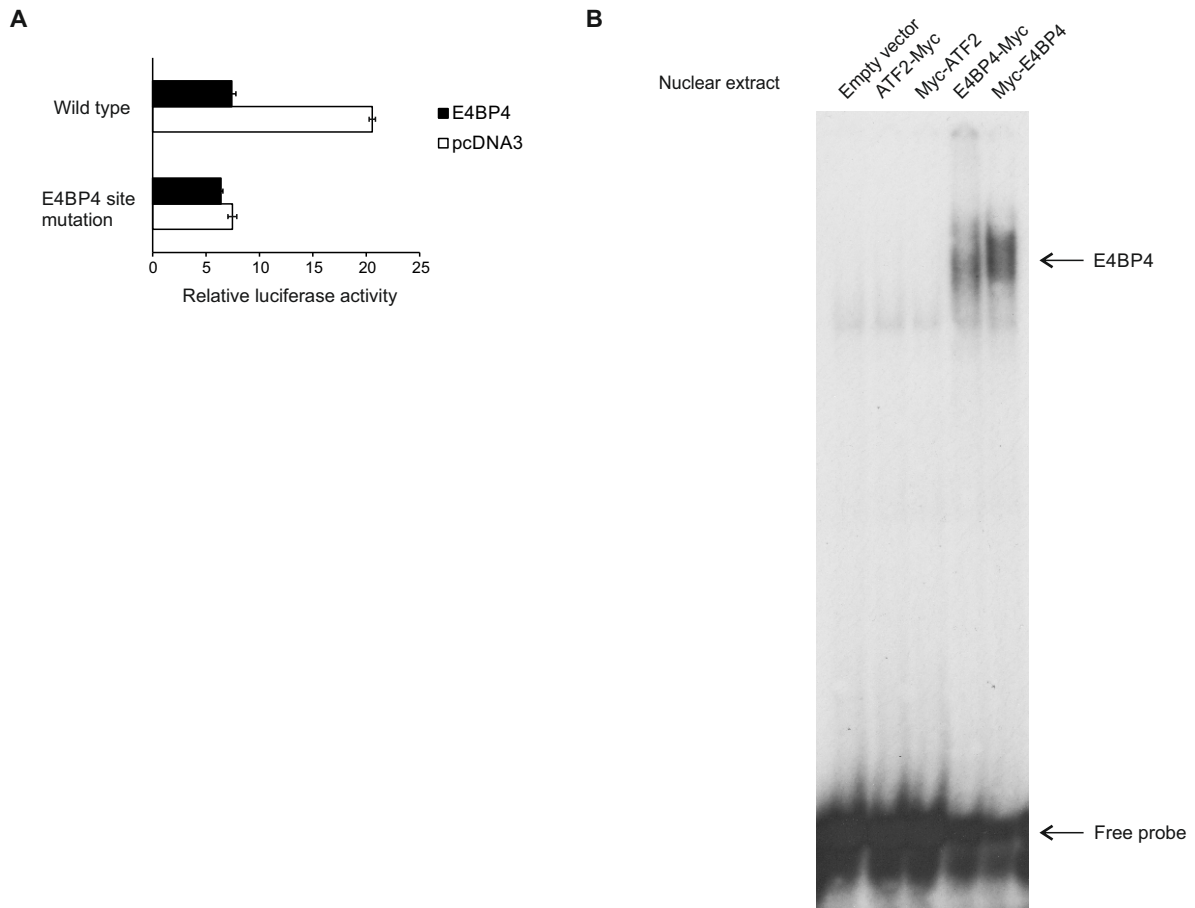

**Appendix Figure S2.** E4BP4 represses the upstream MICA promoter.

**A.** Reporter assays of upstream promoter activity showing repression of the upstream promoter by E4BP4. E4BP4 overexpression in HeLa cells causes significant downregulation of wild-type upstream promoter activity, whereas mutation of the E4BP4 binding site within the upstream promoter abolishes this response to E4BP4. Error bars represent standard deviations of 3 replicates.

**B.** EMSA showing binding of E4BP4 to the upstream promoter. Nuclear extracts from 293T cells transfected with the constructs indicated were incubated with  $^{32}$ P-labeled probes containing the upstream promoter E4BP4 site. The E4BP4 site binds to both N- and C-terminal myc-tagged E4BP4, but not to control ATF2 transcription factor.

**Appendix Table S1.** Summary of isogenic BAC cell lines

| BAC name             | Clones screened | Clones verified |
|----------------------|-----------------|-----------------|
| 53kb-WT              | 56              | 2               |
| 53kb-UPdel           | 56              | 2               |
| 53kb-SPdel           | 34              | 2               |
| 53kb-Ter             | 46              | 4               |
| 53kb-UP-Dox          | 35              | 5               |
| 53kb-SP-Dox          | 36              | 5               |
| 161kb-WT             | 32              | 2               |
| 161kb-UPdel          | 32              | 3               |
| 161kb-SPdel          | 32              | 2               |
| 161kb-Ter            | 32              | 3               |
| Total (success rate) | 391             | 30 (8%)         |

**Appendix Table S2.** Primer sequences.

| Primer ID | Sequence                                                                               |
|-----------|----------------------------------------------------------------------------------------|
| CO196     | AATATTGGATCCATGGCCCCGACGTCGCCACCC                                                      |
| CO211     | AATTAAGCTTAAGTACTTAAGAGAACTGAGGAGGAAGAG                                                |
| CO213     | AATTAAGCTTAGGCAATTCTTTAGTAGAAAGAGG                                                     |
| CO219     | AATTAAGCTTCGAAGCTGGTCCCTGCTTTAGGC                                                      |
| CO230     | AGTCCTCGCGACAAGTTTAAATTAATAAGTTTCCGCGCGCCTTCTC                                         |
| CO233     | AATTATCGCGACAAGTATGCATCTAAGTTCCGGGCCCCAGTTTC                                           |
| CO315     | ATAAATTGTGTGGCATATGAATTCTC                                                             |
| CO400     | AATTAAGCTTTCTGCCCGGAGCCTGCAGAC                                                         |
| CO440     | AATTAAGCTTCCAAGCGTGGCCCCGCC                                                            |
| CO441     | AATTAAGCTTCGCTCGTGATTGGCCCTAAGTT                                                       |
| CO455     | GACGCAAATGGGCGGTAGGCG                                                                  |
| CO606     | CCAGGACCTGCAGGCTCACGA                                                                  |
| CO631     | TCCATGACAACCTTTGGTATCGTGG                                                              |
| CO632     | CACCACCCTGTTGCTGTAGCC                                                                  |
| CO717     | AATTAAGCTTAAATTAGGATCCTCACTGAAGTGG                                                     |
| CO744     | AATTAAGCTTAGAGCAGACGGGGTTGGAGG                                                         |
| CO745     | AATTAAGCTTACAGAAAAGTGTAGGCTAGGGATC                                                     |
| CO1074    | AATTAAGCTTCCCTCTCTCAGACTTTAGGC                                                         |
| CO1075    | AATTAGATCTAAATTAGGATCCTCACTGAAGTGG                                                     |
| CO1099    | TTCCGGACCCTGCAGTGGCG                                                                   |
| CO1109    | GGGTCATCCTGAGGTCTTTCCG                                                                 |
| CO1111    | TCTTCTGCTTCTGGCTGGCAT                                                                  |
| CO1163    | AATTAAGCTCGAGCGGCCCTCAGTGGAAACCAG                                                      |
| CO1169    | AATTAAGCTTCCGGACCCTGCAGTGGCG                                                           |
| CO1176    | AATTACGCGTCACTGTGGTAGTGGAGATGTGG                                                       |
| CO1408    | AATTAGATCTATCCCAGTCTCGCAGTGAATTC                                                       |
| CO1409    | AATTAGATCTAGGAGAATCGCTTAAACCTTGGAG                                                     |
| CO1410    | AATTAGATCTATCCTGGAATACGTGGGCGGC                                                        |
| CO1612    | AATTAGATCTCAGCCTGGGCAACAAGAGGGA                                                        |
| CO1613    | AATTAGATCTCCGCCCTGGGTTATGTAAGCG                                                        |
| CO1641    | AATTAGATCTTTCCGGGGCGGAGCGGAG                                                           |
| CO1642    | AATTAGATCTAACTCCGTCGCAAAAACCTTTCCGG                                                    |
| CO1743    | AATTAGGATCCGCCATGGGGCTGGGCCCGGTCT                                                      |
| CO1780    | AATTAGGATCCTTCCGGACCCTGCAGTGGCG                                                        |
| CO1831    | GAATGCCGAAGAGGAAGGCCAG                                                                 |
| CO1832    | GGCAAGGGCAGGAAGATGACTC                                                                 |
| CO1892    | GATCTGGTACCATGGCATCAATGCAGAAGCTGATCTCAGAGGAGGACCTGCTTGGATCCGAATTCC                     |
| CO1893    | TCGAGGAATTCGGATCCAAGCAGGTCCTCTCTGAGATCAGCTTCTGCATTGATGCCATGGTACCA                      |
| CO2296    | GATCCGAATTCCTCGAGGAACAAAACTCATCTCAGAAGAGGATCTGTGAG                                     |
| CO2297    | TCGACTCACAGATCCTCTTCTGAGATGAGTTTTTGTTCCTCGAGGAATTCCG                                   |
| CO2354    | AATTAAGCTCGAGGGCGCCCTCAGTGGAGCCAG                                                      |
| CO2405    | AATTAGGATCCAAATTCAAGTTACATGTGAATTCTGC                                                  |
| CO2406    | AATTAAGCTCGAGACTTCTGAGGGCTGTGACTGG                                                     |
| CO2407    | AATTAGGATCCGCCATGAAATTCAAGTTACATGTGAATTCTGC                                            |
| CO2408    | AATTAAGCTCGAGTCAACTTCTGAGGGCTGTGACT                                                    |
| CO2409    | AATTAGGATCCAGCTGAGAAAAATGCAGACCGT                                                      |
| CO2410    | AATTAAGCTCGAGCCCAGAGTCTGAAGCAGAGATTG                                                   |
| CO2411    | AATTAGGATCCGCCATGCAGCTGAGAAAAATGCAGACC                                                 |
| CO2412    | AATTAAGCTCGAGTTACCCAGAGTCTGAAGCAGAGAT                                                  |
| CO2486    | GCCCCGCCCTGGGTTGGATCCGCGACCGCGCTGGGC                                                   |
| CO2487    | GCCCAGCGCGGTGCGCGATCCAACCCAGGGCGGGGC                                                   |
| CO2717    | CTATGCCCCAGTAAGCTAGG                                                                   |
| CO2718    | GCCTTCCATAGACATCCTGA                                                                   |
| CO2871    | CATGATGAGTCTTCTCGAGGC                                                                  |
| CO2872    | ATCCTGACGCCAGGTCAGTATGA                                                                |
| CO2974    | ACTGAAAGCTTGGGTGCAAGGCCCGGAGATGAG                                                      |
| CO3036    | ACTGAGCGGCCGCATCGATTCCCCAGCATGCCTGCTATTGTC                                             |
| CO3050    | ACAGGCAGAAATGCAGGGCAAAGCCCCAGGGACAGTGGGCAGAAGATGTGCGCCTGGTGTGATGATGGCGGGATCG           |
| CO3051    | GCAGAATTGGAGGGAGAGGAGAGCCCTGGCCAGCGTCCGTACCTGTTCTTCCAGAAGAACTCGTCAAGAAGGCG             |
| CO3150    | ACTGAGCTAGCTAGGTCCCTCGACTATAGGGTC                                                      |
| CO3151    | ACTGACCTGCAGGTATTTGAAGCTGAAGAAGTTATCACT                                                |
| CO3154    | ACTGACCTGCAGGCTCCCTCCCGTGTCTGTGCTATT                                                   |
| CO3156    | ACTGACCCGGGATATCGCGGCCCGCCTGGCCGTGCA                                                   |
| CO3162    | ACTGACTCGAGGAAGTTCTATTCTTAGAAAATATAGGAAGTCTCTAGAAAAGGCGCCTGGGAATTC                     |
| CO3163    | ACTGAAAGCTTTACCGTTTCGTATAGCATAATTACGAAGTTATACCAATATGGGATCGGCCATTGA                     |
| CO3164    | ACTGAGGATCCATAACTTCGTATAGTATACATTATACGAAGTTATCCCCAGCTGGTTCTTTCCGCC                     |
| CO3169    | ACTGAGGATCCATGCCACGCTACTGCGGGTTT                                                       |
| CO3170    | ACTGAGCTAGCCTCAGTTAGCCTCCCCATCTCC                                                      |
| CO3173    | ACTGAAAGCTTGGCGCCGCGAAGTTCTATTCTTAGAAAATATAGGAAGTTCGCCACCATGGGGAAAAAGCCTGAACTCACCGCGAC |
| CO3174    | ACTGAGGATCCTTCTTTGCCCTCGGACGAGTG                                                       |
| CO3175    | CGATCCGCGGAGATCTGGTACCCTCGAGC                                                          |
| CO3176    | CCGGGCTCGAGGGTACCAGATCTCCGCGGAT                                                        |
| CO3411    | ACTGAAGATCTGCGCAGTTTCTACTCACCCGG                                                       |
| CO3446    | ACTGAAGATCTATAACTTCGTATAGCATAATTATACGAACGGTAGCCACCATGGGGAAAAAGCCTG                     |
| CO3447    | ACTGACTCGAGGAAGTTCTATACTTTCTAGAGAATAGGAAGTTCCTCCCCAGCATGCCTGCTATTGTC                   |
| CO3449    | ACTGAGATATCCACTGCTTGACCCGCTGAGAGG                                                      |
| CO3450    | ACTGAGATATCAAAGTTTTTTCGACGGAGTTTTTCC                                                   |
| CO3451    | ACTGAGATATCTTCCGGACCCTGCAGTGGCG                                                        |
| CO3469    | ACTGAGATATCAGTAGCTGAGAGTACAGCTCAA                                                      |
| CO3494    | GTGGTCCGATGCCGGGAGGGCAGGCAGGGCCCTGGCCGTGCTTATGAAGGGCCTGGTGTGATGATGGCGGGATCG            |
| CO3495    | AGCCAGAAGCAGAAAGACCGGGCCAGCCCCATGGCCCCGACGTCGCCACTCAGAAGAACTCGTCAAGAAGGCG              |
| CO3496    | CGGGGGCGGAGCGGAGCCCCGCCCTGGGTTATGTAAGCGACCGCGCTGGGGCCTGGTGTGATGATGGCGGGATCG            |
| CO3497    | CCCCATGCACTCACGAGCACAGAGGCGACTTCCCTCTCTCAGACTTTAGGTCAGAAGAACTCGTCAAGAAGGCG             |
| CO3506    | GTTTCTTGTGAGGTACACTTGGACGGACAGCCCTTCTGCG                                               |
| CO3507    | CGCAGGAAGGGCTGTCCTCCAAGTGTACCTCAGCAAGAAAC                                              |

---

CO3525 GAAGGGCTGTCCGTCCAAG  
CO3526 TTCTGCTTCTGGCTGGCAT  
CO3540 ACTGACCTGCAGGTCAGGTCCTGAATATCTTTGTTAATTT  
CO3541 ACTGACTCGAGGCGGCCGCGAATATATGAATGATTGGTGTACCTG  
CO3611 CTGGGCCGTTTCTCTTTCTTTTCCG  
CO3612 CGGAAAAGAAAGAGAAAACGGCCAG  
CO3615 CTGGGCCGTTTCTGTGCGACTTTCCG  
CO3616 CGGAAAGTCGACAGAAAACGGCCAG  
CO3621 CGCGCTGGGCCGTTTCTGTGCGACTTTCCGGACCCTGCAGT  
CO3622 ACTGCAGGGTCCGGAAAGTCGACAGAAAACGGCCAGCGCG  
CO3705 AGAGGGAAGTCGCCTCTGTGCT  
CO3706 TGGCATCTTCCCTTTTGCACC  
CO3707 CCAGGGTCATCCTGAGGTCCTTT  
CO3708 CTGGTCTCTGTCCCATGTCTTATT  
CO3740 CCAATCCGTGCATTGGTTACAAGT  
CO3741 GGCTGCCTGGAGTACTGCATCA  
CO3744 TTGCCATCAATGACCCCTTCA  
CO3745 CGCCCCACTTGATTTTGGGA  
CO3746 GTAACCCGTTGAACCCATT  
CO3747 CCATCCAATCGGTAGTAGCG  
CO3812 ACTGAGGTACCAAGTTTAAACAAGAGCTCACGGGGAGAGCCCC  
CO3813 ACTGACTCGAGCTACTGACTCCGTCCTGGAGT  
CO3814 ACTGAGCGGCCGCGAGCTCACGGGGAGAGCCCC  
CO3815 ACTGACCGCGAAGTTTAAACAACACTGACTCCGTCCTGGAGT  
CO4080 GAAGGGCTGACCATCCAGA  
CO4210 GCTGATGGCGATGAATGAACACT  
CO4211 TGCCTTTGCTGGCTTTGATGAAA  
CO4311 ACTGAGGTACCTATCATGCCTCTTGCACCATTCTA  
CO4312 ACTGAGGTACCATTTCATCCCACATAACTGAAATTTTATAC  
CO4313 ACTGAGGTACCCAAGCCCTTACCTCCACGGTGT  
CO4314 ACTGAGGTACCGGACCTGTGTGAGGAGAGCTAG  
CO4420 CACGGAGGAAGTCTGAGGGGAGGGTAGACACCGTGGAGGTAAGGGCTTGGGCCTGGTGATGATGGCGGGATCG  
CO4421 CTAGTGAGAGACTGGGAGGGAGATGGACCTAGCTCTCCTGACACAGGTCCTCAGAAGAACTCGTCAAGAAGGCG  
CO4475 ACTGAGGATCCGCCACCATGTCTAGGCTGGACA  
CO4476 ACTGACTCGAGTTACCCGGGGAGCATGTCAAGG  
CO5217 TACCTGTCGTTTCTGGCAAGCGT  
CO5218 TCTGGCTGTTTCTAGCCACGCG  
CO5219 TTTCCGGACCGAGTTGTGCCAG  
CO5220 TTCCCGACCCTGTAGTGGTACC  
CO5221 GACACTTCCTGAGGTCCTCTACT  
CO5222 AGAAGTTTTCTGAGCTCCTTCCAG  
CO5223 AAGCTCACTGGCATGGCCTTCC  
CO5224 TGAGGTCCACCACCTGTTGCT  
CO5418 ACTGAGGATCCACTGTCTATGCCTGGGAAAGGGT  
CO5419 ACTGAGCGGCCGCATAACTTCGTATAATGTATACTATACGAAGTTATCAAGAAAGCGAGCTTCTAGCTTATC  
CO5420 CGTAAGCGGGGCACATTTTCACTCTTTCTCCGCACCCGACATAGATAACTGTCTATGCCTGGGAAAGGGT  
CO5421 TCACTTAACATACTGACCTCCAGTTCCATCCATGTTGCTGCTAGTTATTAGCGGCCGCATAACTTCGTATAATG  
CO5468 TCGACGAATCCATGTGGGAGTTTATTCTTGACACAGATATTATGATATAATAACTGAGTAAGCTTAACATAAGGAGGAAAAACA  
CO5469 TATGTTTTTCTCCTTATGTTAAGCTTACTCAGTTATTATATCATAAATATCTGTGTCAAGAATAAACTCCCACATGGATTCCG  
CO5470 ACTGAGGATCCATATGTTACGCAGCAGCAACGATGTT  
CO5471 ACTGAGCTAGCTTAGGTGGCGGTAAGTTGGGTCG  
CO5489 CCGATGCAAGTGTGTGCTGTGCGACGGTGACCCTATAGTCGAGGGACCTACGAATCCATGTGGGAGTTTATTCTT  
CO5490 TGGGTGATCGCCCAAGGAATGGTGTGTCATATTGAGAGCTCAGTGTGGTCTTTAGGTGGCGGTAAGTTGGGTCG  
CO5943 CACCGAGCGAAGACCGCTATAAGTC  
CO5944 AAACGACTTATAGCGGTCTTCGCTC  
CO6334 CACCGGTCGCAAAAACCTTTCCGGGG  
CO6335 AAACCCCCGAAAGTTTTTGCAGCC  
CO6336 CACCGTCCGTCGCAAAAACCTTTCCGG  
CO6337 AAACCCGAAAGTTTTTGCAGCGGAC  
CO6338 CACCGGTTATGTAAGCGACCGCGCT  
CO6339 AAACAGCGCGGTGCTTACATAACC  
CO6340 CACCGGGCGCCTAAAGTCTGAGAGA  
CO6341 AAACCTCTCTCAGACTTTAGGCGCCC  
CO6351 TGGGAGAATAGCCACGCGTT  
CO6357 CCCATTAACCGGCTCTCACTG  
CO6358 CCGGCCGCCCATTAAC  
CO6359 CACCGCAACTGTCTCCTGCGTTGCT  
CO6360 AAACAGCAACGCAGGAGACAGTTGC  
CO6392 CTCCCTCAGCACTTGCCTTATAC  
CO6395 CCGGGCAGCAAAATTCAAACACA  
CO6696 GCCCTGGGTTATGTAAGCGA  
CO6699 TCCAACCCCGTCTGCTCTA  
CO8273 CACCGGCCCCCGAAAGTTTTTGCAG  
CO8274 AAACCTCGCAAAAACCTTTCCGGGGGCC  
CO8287 CACCGCCAGAAAATGGGGAGCACGC  
CO8288 AAACGCGTGCTCCCCATTTTCTGGC  
CO8293 CACCGGAAGCGTGGGATCTGGAATC  
CO8294 AAACGATTCCAGATCCCACGCTTCC  
CO8295 CACCGTGGCCTCTGACTTACTTGGGA  
CO8296 AAACCTCAAAGTAAGTCAGAGGCCAC  
CO8299 ACTGAGACGTGAGGAGAATCCTGGCCCAATGGTGAGCAAGGGCGAGGA  
CO8300 ACTGATTACTTGTACAGCTCGTCCATGCCG

---

Appendix Table S3. Details of plasmid construction.

| Plasmid information |                         |            | Cloning details <sup>1</sup> |           | Mutagenesis primers    | Insert          | Insert enzymes                  | Insert2           | Insert2 enzymes                        |
|---------------------|-------------------------|------------|------------------------------|-----------|------------------------|-----------------|---------------------------------|-------------------|----------------------------------------|
| Plasmid type        | Plasmid name            | Plasmid ID | Source                       | Vector ID |                        |                 |                                 |                   |                                        |
| Reporter assay      | MICA-ST-P-28bp          | POC155     | -                            | POC147    | SmaI/NcoI              | NA <sup>2</sup> | POC347-CO230/196                | NruI/NcoI         | NA                                     |
| Reporter assay      | MICA-ST-P-85bp          | POC159     | -                            | POC147    | SmaI/NcoI              | NA              | POC347-CO233/196                | NruI/NcoI         | NA                                     |
| Reporter assay      | MICA-ST-P-100bp         | POC278     | -                            | POC147    | HindIII/NcoI           | NA              | POC347-CO441/196                | HindIII/NcoI      | NA                                     |
| Reporter assay      | MICA-ST-P-124bp         | POC277     | -                            | POC147    | HindIII/NcoI           | NA              | POC347-CO440/196                | HindIII/NcoI      | NA                                     |
| Reporter assay      | MICA-ST-P-232bp         | POC149     | -                            | POC147    | HindIII/NcoI           | NA              | POC347-CO219/196                | HindIII/NcoI      | NA                                     |
| Reporter assay      | MICA-ST-P-877bp         | POC150     | -                            | POC147    | HindIII/NcoI           | NA              | POC347-CO211/196                | HindIII/NcoI      | NA                                     |
| Reporter assay      | MICA-ST-P-1643bp        | POC151     | -                            | POC147    | HindIII/NcoI           | NA              | POC347-CO213/196                | HindIII/NcoI      | NA                                     |
| Reporter assay      | MICA-ST-P-2233bp        | POC385     | -                            | POC147    | HindIII/NcoI           | NA              | POC347-CO745/196                | HindIII/NcoI      | NA                                     |
| Reporter assay      | MICA-ST-P-2779bp        | POC383     | -                            | POC147    | HindIII/NcoI           | NA              | POC347-CO744/196                | HindIII/NcoI      | NA                                     |
| Reporter assay      | MICA-ST-P-3755bp        | POC347     | -                            | POC147    | HindIII/NcoI           | NA              | Human genomic DNA-CO717/196     | HindIII/NcoI      | NA                                     |
| Reporter assay      | MICA-ST-P-3755bp-WT     | POC1315    | -                            | POC147    | HindIII/NcoI           | NA              | BAC-BLB53-CO717/196             | HindIII/NcoI      | NA                                     |
| Reporter assay      | MICA-ST-P-3755bp-SPdel  | POC1316    | -                            | POC147    | HindIII/NcoI           | NA              | BAC-BLB55-CO717/196             | HindIII/NcoI      | NA                                     |
| Reporter assay      | MICA-ST-P-3755bp-UPdel  | POC1317    | -                            | POC147    | HindIII/NcoI           | NA              | BAC-BLB58-CO717/196             | HindIII/NcoI      | NA                                     |
| Reporter assay      | MICA-UT-P-39bp          | POC918     | -                            | POC147    | BglII/HindIII          | NA              | POC1284-CO1613/1074             | BglII/HindIII     | NA                                     |
| Reporter assay      | MICA-UT-P-61bp          | POC1286    | -                            | POC147    | BglII/HindIII          | NA              | POC1284-CO1641/1074             | BglII/HindIII     | NA                                     |
| Reporter assay      | MICA-UT-P-78bp          | POC1287    | -                            | POC147    | BglII/HindIII          | NA              | POC1284-CO1642/1074             | BglII/HindIII     | NA                                     |
| Reporter assay      | MICA-UT-P-99bp          | POC917     | -                            | POC147    | BglII/HindIII          | NA              | POC1284-CO1612/1074             | BglII/HindIII     | NA                                     |
| Reporter assay      | MICA-UT-P-162bp         | POC916     | -                            | POC147    | BglII/HindIII          | NA              | POC1284-CO1409/1074             | BglII/HindIII     | NA                                     |
| Reporter assay      | MICA-UT-P-403bp         | POC915     | -                            | POC147    | BglII/HindIII          | NA              | POC1284-CO1408/1074             | BglII/HindIII     | NA                                     |
| Reporter assay      | MICA-UT-P-702bp         | POC914     | -                            | POC147    | BglII/HindIII          | NA              | POC1284-CO1410/1074             | BglII/HindIII     | NA                                     |
| Reporter assay      | MICA-UT-P-861bp         | POC913     | -                            | POC147    | BglII/HindIII          | NA              | POC1284-CO1075/1074             | BglII/HindIII     | NA                                     |
| Reporter assay      | MICA-UT-P-3167bp        | POC1284    | -                            | POC147    | MluI/HindIII           | NA              | Human genomic DNA-CO1176/1074   | MluI/HindIII      | NA                                     |
| Reporter assay      | MICA-UT-P-78bp-ISREmut  | POC1311    | -                            | POC1287   | NA                     | CO3621/3622     | NA                              | NA                | NA                                     |
| Reporter assay      | MICA-UT-P-702bp         | POC1338    | -                            | POC1342   | HindIII/NcoI           | NA              | POC914                          | HindIII/NcoI      | NA                                     |
| Reporter assay      | MICA-UT-P-702bp-E4BP4m  | POC1339    | -                            | POC1338   | NA                     | CO2486/2487     | NA                              | NA                | NA                                     |
| CRISPR              | PX458-C40               | POC1331    | -                            | POC1329   | BbsI                   | NA              | Oligos CO6334/6335 annealed     | NA                | NA                                     |
| CRISPR              | PX458-C41               | POC1332    | -                            | POC1329   | BbsI                   | NA              | Oligos CO6336/6337 annealed     | NA                | NA                                     |
| CRISPR              | PX458-C42               | POC1333    | -                            | POC1329   | BbsI                   | NA              | Oligos CO6338/6339 annealed     | NA                | NA                                     |
| CRISPR              | PX458-C43               | POC1334    | -                            | POC1329   | BbsI                   | NA              | Oligos CO6340/6341 annealed     | NA                | NA                                     |
| CRISPR              | PX458-C50               | POC1335    | -                            | POC1329   | BbsI                   | NA              | Oligos CO6357/6358 annealed     | NA                | NA                                     |
| CRISPR              | PX458-C52               | POC1336    | -                            | POC1329   | BbsI                   | NA              | Oligos CO6359/6360 annealed     | NA                | NA                                     |
| CRISPR              | PX458-C14               | POC1330    | -                            | POC1329   | BbsI                   | NA              | Oligos CO5943/5944 annealed     | NA                | NA                                     |
| SAM                 | UniSamG-MICAUT          | POC1407    | -                            | POC1406   | BbsI                   | NA              | Oligos CO8273/8274 annealed     | NA                | NA                                     |
| SAM                 | UniSamG-MICAST          | POC1408    | -                            | POC1406   | BbsI                   | NA              | Oligos CO8287/8288 annealed     | NA                | NA                                     |
| SAM                 | UniSamG-CD43            | POC1409    | -                            | POC1406   | BbsI                   | NA              | Oligos CO8293/8294 annealed     | NA                | NA                                     |
| SAM                 | UniSamG-CD36            | POC1410    | -                            | POC1406   | BbsI                   | NA              | Oligos CO8295/8296 annealed     | NA                | NA                                     |
| Overexpression      | MICA-ST-myc             | POC1289    | -                            | POC992    | BamHI/XhoI             | NA              | HT29 cDNA-CO1743/2354           | BamHI/XhoI        | NA                                     |
| Overexpression      | MICA-UT-myc             | POC1290    | -                            | POC992    | BamHI/XhoI             | NA              | HT29 cDNA-CO1780/2354           | BamHI/XhoI        | NA                                     |
| Overexpression      | pcDNA3-Cmyc             | POC992     | -                            | POC167    | BamHI/XhoI             | NA              | Oligos CO2296/2297 annealed     | NA                | NA                                     |
| Overexpression      | MICA-UT                 | POC1285    | -                            | POC366    | XhoI/HindIII           | NA              | HT29 cDNA-CO1169/1163           | XhoI/HindIII      | NA                                     |
| Overexpression      | E4BP4                   | POC987     | -                            | POC167    | BamHI/XhoI             | NA              | PBMC cDNA-CO2411/2412           | BamHI/XhoI        | NA                                     |
| Overexpression      | pcDNA3-Nmyc             | POC931     | -                            | POC167    | BamHI/XhoI             | NA              | Oligos CO1892/1893 annealed     | NA                | NA                                     |
| Overexpression      | Myc-E4BP4               | POC990     | -                            | POC931    | BamHI/XhoI             | NA              | PBMC cDNA-CO2409/2412           | BamHI/XhoI        | NA                                     |
| Overexpression      | E4BP4-Myc               | POC991     | -                            | POC992    | BamHI/XhoI             | NA              | PBMC cDNA-CO2410/2411           | BamHI/XhoI        | NA                                     |
| Overexpression      | Myc-ATF2                | POC1340    | -                            | POC931    | BamHI/XhoI             | NA              | PBMC cDNA-CO2405/2408           | BamHI/XhoI        | NA                                     |
| Overexpression      | ATF2-Myc                | POC1341    | -                            | POC992    | BamHI/XhoI             | NA              | PBMC cDNA-CO2406/2407           | BamHI/XhoI        | NA                                     |
| BAC landing site    | pBS-Landing             | POC1314    | -                            | POC1313   | KpnI/XhoI              | NA              | POC1312                         | KpnI/XhoI         | NA                                     |
| Lentivirus          | pHR-SIN-rtTA3           | POC1325    | -                            | POC567    | BamHI/XhoI             | NA              | POC1324-CO4475/4476             | BamHI/XhoI        | NA                                     |
| BAC modification    | -                       | POC1309    | -                            | POC1292   | NA                     | CO3506/3507     | NA                              | NA                | NA                                     |
| BAC modification    | -                       | POC1308    | -                            | POC1306   | EcoRV/BamHI            | NA              | BAC-CH501-248L24-CO3411/3450    | EcoRV/BamHI       | NA                                     |
| BAC modification    | -                       | POC1307    | -                            | POC1305   | EcoRV/EcoRI            | NA              | BAC-CH501-248L24-CO213/3469     | EcoRV/EcoRI       | NA                                     |
| BAC modification    | -                       | POC1323    | -                            | POC1308   | EcoRV/CIP              | NA              | POC1319                         | XhoI/EcoRI/Klenow | NA                                     |
| BAC modification    | -                       | POC1322    | -                            | POC1307   | EcoRV/CIP              | NA              | POC1319                         | XhoI/EcoRI/Klenow | NA                                     |
| BAC modification    | -                       | POC1321    | -                            | POC1318   | KpnI/CIP               | NA              | POC1320-CO4311/4312             | KpnI              | NA                                     |
| BAC modification    | -                       | POC1328    | -                            | POC1135   | Sall/NheI              | NA              | POC1327-CO5470/5471             | NdeI/NheI         | Oligos CO5468/5469 annealed            |
| BAC modification    | -                       | POC1304    | -                            | POC1301   | BglII/XhoI             | NA              | POC1303-CO3446/3447             | BglII/XhoI        | NA                                     |
| BAC modification    | -                       | POC1310    | -                            | POC1304   | SbfI/NotI              | NA              | BAC-CH501-248L24-CO3540/3541    | SbfI/NotI         | NA                                     |
| Intermediate        | -                       | POC1406    | -                            | POC1405   | AatII/BsrGI            | NA              | POC1288-CO8299/8300             | AatII/BsrGI       | NA                                     |
| Intermediate        | -                       | POC1326    | -                            | POC167    | BamHI/NotI             | NA              | POC1337-CO5418/5419             | BamHI/NotI        | NA                                     |
| Intermediate        | -                       | POC1303    | -                            | POC1299   | BamHI/Eco53KI          | NA              | POC1300-CO455/3036              | BamHI             | NA                                     |
| Intermediate        | -                       | POC1301    | -                            | POC1297   | ClaI/XmaI              | NA              | Oligos CO3175/3176 annealed     | NA                | NA                                     |
| Intermediate        | -                       | POC1297    | -                            | POC1294   | SbfI/XmaI              | NA              | BAC-CH501-181B23-CO3154/3156    | SbfI/XmaI         | NA                                     |
| Intermediate        | -                       | POC1294    | -                            | POC1295   | SbfI/NheI              | NA              | BAC-CH501-181B23-CO3150/3151    | SbfI/NheI         | NA                                     |
| Intermediate        | -                       | POC1295    | -                            | POC1135   | NotI/T4 DNA polymerase | NA              | NA                              | NA                | NA                                     |
| Intermediate        | -                       | POC1299    | -                            | POC1032   | HindIII/BamHI          | NA              | POC1293-CO3173/3174             | HindIII/BamHI     | NA                                     |
| Intermediate        | -                       | POC1300    | -                            | POC167    | BamHI/XbaI             | NA              | POC1296-CO3169/3170             | BamHI/NheI        | NA                                     |
| Intermediate        | -                       | POC1312    | -                            | POC1302   | KpnI/XhoI              | NA              | Chicken genomic DNA-CO3812/3813 | KpnI/XhoI         | NA                                     |
| Intermediate        | -                       | POC1302    | -                            | POC1298   | HindIII/XhoI           | NA              | POC1291-CO3162/2974             | HindIII/XhoI      | NA                                     |
| Intermediate        | -                       | POC1298    | -                            | POC1032   | HindIII/BamHI          | NA              | POC1027-CO3163/3164             | HindIII/BamHI     | NA                                     |
| Intermediate        | -                       | POC1313    | -                            | POC1302   | NotI/SacII             | NA              | Chicken genomic DNA-CO3814/3815 | NotI/SacII        | NA                                     |
| Intermediate        | -                       | POC1292    | -                            | POC1135   | SmaI/CIP               | NA              | BAC-CH501-248L24-CO2871/2872    | None              | NA                                     |
| Intermediate        | -                       | POC1306    | -                            | POC1135   | EcoRI/SmaI             | NA              | BAC-CH501-248L24-CO3451/315     | EcoRI             | NA                                     |
| Intermediate        | -                       | POC1305    | -                            | POC1135   | PstI/SmaI              | NA              | BAC-CH501-248L24-CO3449/400     | PstI              | NA                                     |
| Intermediate        | -                       | POC1318    | -                            | POC1308   | SacII/EcoRI            | NA              | BAC-CH501-248L24-CO3411/4313    | SacII/KpnI        | BAC-CH501-248L24-CO4314/315 KpnI/EcoRI |
| Source              | pTREtight               | POC1319    | Clontech                     |           |                        |                 |                                 |                   |                                        |
| Source              | pIRES1neo               | POC1027    | Clontech                     |           |                        |                 |                                 |                   |                                        |
| Source              | pEGFP-N1                | POC1288    | Clontech                     |           |                        |                 |                                 |                   |                                        |
| Source              | pBluescript II-KS+      | POC1032    | Stratagene                   |           |                        |                 |                                 |                   |                                        |
| Source              | pTRIPZ                  | POC1324    | Dharmacon                    |           |                        |                 |                                 |                   |                                        |
| Source              | pACYC-cpn10/cpn60       | POC1327    | Agilent                      |           |                        |                 |                                 |                   |                                        |
| Source              | pcDNA 3.1/myc-His(-) C  | POC366     | Invitrogen                   |           |                        |                 |                                 |                   |                                        |
| Source              | pcDNA3                  | POC167     | Invitrogen                   |           |                        |                 |                                 |                   |                                        |
| Source              | pFUSE-hlgG1-Fc1         | POC1337    | Invitrogen                   |           |                        |                 |                                 |                   |                                        |
| Source              | pGL3B                   | POC147     | Promega                      |           |                        |                 |                                 |                   |                                        |
| Source              | pGL4.23                 | POC1342    | Promega                      |           |                        |                 |                                 |                   |                                        |
| Source              | pSV2hph                 | POC1293    | ATCC                         |           |                        |                 |                                 |                   |                                        |
| Source              | pPGK.NeoR               | POC1291    | ATCC                         |           |                        |                 |                                 |                   |                                        |
| Source              | pHR-SIN-BX-IRES-Emerald | POC567     | Dr Xiaoning Xu               |           |                        |                 |                                 |                   |                                        |
| Source              | bd5-7                   | POC1320    | Prof Nicholas Proudfoot      |           |                        |                 |                                 |                   |                                        |
| Source              | PX458                   | POC1329    | Addgene                      |           |                        |                 |                                 |                   |                                        |
| Source              | pHSV-TK                 | POC1296    | Dr Ben Davis                 |           |                        |                 |                                 |                   |                                        |
| Source              | pSG80A                  | POC1135    | Dr Ben Davis                 |           |                        |                 |                                 |                   |                                        |
| Source              | UniSam                  | POC1405    | Addgene                      |           |                        |                 |                                 |                   |                                        |

1. Plasmids were constructed by either PCR-based site-directed mutagenesis followed by DpnI digestion, or standard restriction enzyme-based cloning. For site-directed mutagenesis, the primers used are listed under "Mutagenesis primers". For standard cloning, the source of the insert is listed under "Insert", which could be either a PCR product, a plasmid or double strand DNA resulting from annealing two oligonucleotides. The restriction enzymes used to digest the insert are listed under "Insert enzymes", and the vector name and enzymes used to digest the vector under "Vector ID" and "Vector enzymes". Some of the plasmids were constructed by three-way ligation, for which details of the second insert are listed under "Insert2" and "Insert2 enzymes".

2. NA, Not applicable

**Appendix Table S4.** Details of BAC construction.

| BAC name    | BAC ID | Parent BAC vector | Step 1: MICA tagging <sup>1</sup> |                        | Step 2: MICA tagging     |             | Step 3: Promoter modification |             | Step 4: Promoter modification |             | Step 5: Truncation, concatenation or retrofitting |             | Step 6: Truncation, concatenation and/or retrofitting |             |
|-------------|--------|-------------------|-----------------------------------|------------------------|--------------------------|-------------|-------------------------------|-------------|-------------------------------|-------------|---------------------------------------------------|-------------|-------------------------------------------------------|-------------|
|             |        |                   | Recombineering construct          | Selection <sup>2</sup> | Recombineering construct | Selection   | Recombineering construct      | Selection   | Recombineering construct      | Selection   | Recombineering construct                          | Selection   | Recombineering construct                              | Selection   |
| 53kb-WT     | BLB53  | CH501-248L24      | Rpslneo-CO3050/3051               | Chl+Kan+Tet            | POC1309-NcoI/XhoI        | Chl+Str+Tet | NA <sup>3</sup>               | NA          | NA                            | NA          | POC1304-SbfI                                      | Chl+Amp     | NA                                                    | NA          |
| 53kb-UPdel  | BLB58  | CH501-248L24      | Rpslneo-CO3050/3051               | Chl+Kan+Tet            | POC1309-NcoI/XhoI        | Chl+Str+Tet | Rpslneo-CO3496/3497           | Chl+Kan+Tet | POC1308-BamHI/SalI            | Chl+Str+Tet | POC1304-SbfI                                      | Chl+Amp     | NA                                                    | NA          |
| 53kb-SPdel  | BLB55  | CH501-248L24      | Rpslneo-CO3050/3051               | Chl+Kan+Tet            | POC1309-NcoI/XhoI        | Chl+Str+Tet | Rpslneo-CO3494/3495           | Chl+Kan+Tet | POC1307-PstI/EcoRI            | Chl+Str+Tet | POC1304-SbfI                                      | Chl+Amp     | NA                                                    | NA          |
| 53kb-UP-Dox | BLC46  | CH501-248L24      | Rpslneo-CO3050/3051               | Chl+Kan+Tet            | POC1309-NcoI/XhoI        | Chl+Str+Tet | Rpslneo-CO3496/3497           | Chl+Kan+Tet | POC1323-BamHI/SalI            | Chl+Str+Tet | POC1304-SbfI                                      | Chl+Amp     | NA                                                    | NA          |
| 53kb-SP-Dox | BLC45  | CH501-248L24      | Rpslneo-CO3050/3051               | Chl+Kan+Tet            | POC1309-NcoI/XhoI        | Chl+Str+Tet | Rpslneo-CO3494/3495           | Chl+Kan+Tet | POC1322-NdeI/PstI             | Chl+Str+Tet | POC1304-SbfI                                      | Chl+Amp     | NA                                                    | NA          |
| 53kb-Ter    | BLC50  | CH501-248L24      | Rpslneo-CO3050/3051               | Chl+Kan+Tet            | POC1309-NcoI/XhoI        | Chl+Str+Tet | Rpslneo-CO4420/4421           | Chl+Kan+Tet | POC1321-BamHI/SalI            | Chl+Str+Tet | POC1304-SbfI                                      | Chl+Amp     | NA                                                    | NA          |
| 161kb-WT    | BLD33  | CH501-248L24      | Rpslneo-CO3050/3051               | Chl+Kan+Tet            | POC1309-NcoI/XhoI        | Chl+Str+Tet | NA                            | NA          | NA                            | NA          | POC1310-SbfI                                      | Chl+Amp+Tet | BLD24-BspEI                                           | Chl+Zeo+Amp |
| 161kb-UPdel | BLD35  | CH501-248L24      | Rpslneo-CO3050/3051               | Chl+Kan+Tet            | POC1309-NcoI/XhoI        | Chl+Str+Tet | Rpslneo-CO3496/3497           | Chl+Kan+Tet | POC1308-BamHI/SalI            | Chl+Str+Tet | POC1310-SbfI                                      | Chl+Amp+Tet | BLD24-BspEI                                           | Chl+Zeo+Amp |
| 161kb-SPdel | BLD34  | CH501-248L24      | Rpslneo-CO3050/3051               | Chl+Kan+Tet            | POC1309-NcoI/XhoI        | Chl+Str+Tet | Rpslneo-CO3494/3495           | Chl+Kan+Tet | POC1307-PstI/EcoRI            | Chl+Str+Tet | POC1310-SbfI                                      | Chl+Amp+Tet | BLD24-BspEI                                           | Chl+Zeo+Amp |
| 161kb-Ter   | BLD36  | CH501-248L24      | Rpslneo-CO3050/3051               | Chl+Kan+Tet            | POC1309-NcoI/XhoI        | Chl+Str+Tet | Rpslneo-CO4420/4421           | Chl+Kan+Tet | POC1321-BamHI/SalI            | Chl+Str+Tet | POC1310-SbfI                                      | Chl+Amp+Tet | BLD24-BspEI                                           | Chl+Zeo+Amp |
| 181B23Z1G1  | BLD24  | CH501-181B23      | NA                                | NA                     | NA                       | NA          | NA                            | NA          | NA                            | NA          | POC1326-CO5420/5421                               | Chl+Zeo+Tet | POC1328-CO5489/5490                                   | Chl+Zeo+Gen |

1. BAC modifications were carried out by homologous recombination-based recombineering using linear DNA fragments listed under "Recombineering construct" followed by selection with the antibiotics listed under "Selection". Modification steps that included tetracycline selection were carried out at 30°C to retain the pRed-E/T recombineering plasmid to facilitate subsequent recombineering steps. Modification steps without tetracycline selection were carried out at 37°C to remove the recombineering plasmid.

2. Amp, Ampicillin 50 µg/ml; Chl, Chloramphenicol 12.5 µg/ml; Gen, Gentamicin 2 µg/ml; Kan, Kanamycin 15 µg/ml; Str, Streptomycin 50 µg/ml; Tet, Tetracycline 3 µg/ml; Zeo, Zeocin 25 µg/ml.

3. NA, not applicable



**Appendix Table S5.** Coordinates of promoter pairs

| Species | Series                          | Gene   | Strand | Upstream promoter <sup>1</sup> | Downstream promoter <sup>1</sup> |
|---------|---------------------------------|--------|--------|--------------------------------|----------------------------------|
| Human   | Macrophage response to LPS      | CRYBG1 | +      | chr6:106959693-106959893       | chr6:106960041-106960241         |
| Human   | Macrophage response to LPS      | MAD2L2 | -      | chr1:11751501-11751701         | chr1:11741076-11741276           |
| Human   | Epithelial to mesenchymal       | RTKN   | -      | chr2:74668917-74669117         | chr2:74667577-74667777           |
| Human   | Epithelial to mesenchymal       | PNKD   | +      | chr2:219135145-219135345       | chr2:219187779-219187979         |
| Human   | Lymphatic EC response to VEGFC  | MAGED2 | +      | chrX:49344444-49344644         | chrX:49364723-49364923           |
| Human   | Lymphatic EC response to VEGFC  | PLD3   | +      | chr19:40854503-40854703        | chr19:40871670-40871870          |
| Human   | MCF7 response to HRG            | ASAH1  | -      | chr8:17942369-17942569         | chr8:17941514-17941714           |
| Human   | MCF7 response to HRG            | YARS   | -      | chr1:33283653-33283853         | chr1:33282858-33283058           |
| Mouse   | Tracheal to ciliated epithelium | Lama3  | +      | chr18:12492379-12492579        | chr18:12662607-12662807          |
| Mouse   | Tracheal to ciliated epithelium | Ptpre  | +      | chr7:142729406-142729606       | chr7:142797221-142797421         |
| Mouse   | BMM activation IL13             | Ciita  | +      | chr16:10480064-10480264        | chr16:10489737-10489937          |
| Mouse   | BMM activation IL13             | Sdf4   | +      | chr4:155366882-155367082       | chr4:155367249-155367449         |
| Mouse   | MSC to adipocyte                | Cast   | -      | chr13:74945971-74946171        | chr13:74907980-74908180          |
| Mouse   | MSC to adipocyte                | Ppig   | +      | chr2:69560766-69560966         | chr2:69561220-69561420           |
| Mouse   | MSC to osteocyte                | Ak1    | +      | chr2:32483844-32484044         | chr2:32484901-32485101           |
| Mouse   | MSC to osteocyte                | Pde4a  | +      | chr9:20970092-20970292         | chr9:20985930-20986130           |

1. Coordinates for tandem promoter pairs for which expression is plotted in Figure 7
